# Supplementary material for: Daily torpor reduces the energetic consequences of microhabitat selection for a widespread bat
Source: PubMed Central journal article supplement (PMC9286574; doi:10.1002/ecy.3677), 2022-04-11

**Supporting Information.** Alston, J.M., M.E. Dillon, D.A. Keinath, I.M. Abernethy, and J.R. Goheen. 2022. Daily torpor reduces the energetic consequences of microhabitat selection for a widespread bat. *Ecology*.

## Appendix S1: Supplementary Data

### Descriptive Statistics for Rock vs. Tree Microhabitats

During the day, rock microhabitats averaged 20.3°C (range: 16.6° – 24.7°C) while tree microhabitats averaged 19.1°C (range: 16.3° – 26.2°C). Daily maximum temperatures within rock microhabitats averaged 25.9°C (range: 17.9° – 38.3°C), while daily maximum temperatures within tree microhabitats averaged 28.3°C (range: 21.0° – 52.1°C). Temperatures within rock microhabitats peaked at 1444 hrs on average (range = 1006 – 1748 hrs), while temperatures within tree microhabitats peaked at 1357 hrs on average (range = 1056 – 1659 hrs). Ambient temperature strongly influenced temperatures within microhabitats. Temperatures within rock microhabitats at each hour (in °C) followed the equation  $7.84 + 0.72 \times \text{ambient temperature}$  ( $R^2 = 0.54$ ), while temperatures within tree microhabitats at each hour followed the equation  $1.81 + 0.99 \times \text{ambient temperature}$  ( $R^2 = 0.62$ ).

Temperatures within used rock microhabitats averaged 20.8°C (range: 16.9° – 23.6°C) while temperatures within available rock microhabitats averaged 20.0°C (range: 16.6° – 24.7°C). Temperatures within used tree microhabitats averaged 19.0°C (range: 17.8° – 20.8°C) while temperatures within available tree cavities averaged 19.6°C (range: 16.3° – 26.2°C) and temperatures within available spaces under sloughing bark averaged 18.7°C (range: 16.4° – 21.4°C).

Temperatures within used rock microhabitats peaked on average at 1417 hrs (range: 1106 – 1736 hrs), while temperatures within available rock microhabitats peaked on average at 1500 hrs (range: 1006 – 1748 hrs). Temperatures within used tree microhabitats peaked on average at 1447 hrs (range: 1125 – 1659 hrs), while temperatures within available tree cavities peaked on average at 1411 hrs (range: 1121 – 1615 hrs) and temperatures within available spaces under sloughing bark peaked on average at 1349 hrs (range: 1056 – 1608 hrs).

The standard deviation of temperatures within used rock microhabitats was 6.7°C (range: 4.3° – 10.0°C), while the standard deviation of temperatures within available rock microhabitats was 6.1°C (range: 3.2° - 11.0°C). The standard deviation of temperatures within used tree microhabitats was 7.6°C (range: 6.7° - 9.1°C), while the standard deviation of temperatures within available tree cavities was 8.7°C (range: 5.8° - 16.4°C) and within available spaces under sloughing bark was 7.7°C (range: 6.4° - 11.0°C).

There was no difference in ambient temperature between days where rock microhabitats were used and days where tree microhabitats were used (Mann-Whitney U = 287; p = 0.816).

**Table S1.** Information on daily torpor use by bats tracked during our study, including an ID number for each individual, the dates for which we have data, the mass of bats at time of capture, the timing of torpor entry and exit for morning and afternoon bouts of torpor, the duration of periods of torpor in both mornings and afternoons, and the total duration of torpor across the day.

| <b>Bat ID</b> | <b>Date</b> | <b>Mass<br/>(grams)</b> | <b>AM Torpor<br/>Start Time<br/>(hrs)</b> | <b>AM Torpor<br/>End Time<br/>(hrs)</b> | <b>Duration of<br/>AM Torpor<br/>(mins)</b> | <b>PM Torpor<br/>Start Time<br/>(hrs)</b> | <b>PM Torpor<br/>End Time<br/>(hrs)</b> | <b>Duration of<br/>PM Torpor<br/>(mins)</b> | <b>Total Torpor<br/>Duration<br/>(mins)</b> |
|---------------|-------------|-------------------------|-------------------------------------------|-----------------------------------------|---------------------------------------------|-------------------------------------------|-----------------------------------------|---------------------------------------------|---------------------------------------------|
| 172_063       | 8/5/2017    | 6.02                    | 517                                       | 1456                                    | 579                                         | 2013                                      | 2055                                    | 42                                          | 621                                         |
| 172_063       | 8/6/2017    | 6.02                    | 451                                       | 1210                                    | 439                                         | 1910                                      | 2037                                    | 87                                          | 526                                         |
| 172_063       | 8/7/2017    | 6.02                    | 2245                                      | 1557                                    | 1032                                        | 1840                                      | 2044                                    | 124                                         | 1156                                        |
| 172_904       | 6/28/2018   | 6.75                    | 425                                       | 733                                     | 188                                         | 1825                                      | 2057                                    | 125                                         | 313                                         |
| 172_904       | 6/29/2018   | 6.75                    | 419                                       | 1037                                    | 378                                         | 1603                                      | 2114                                    | 277                                         | 655                                         |
| 172_904       | 7/3/2018    | 6.75                    | 525                                       | 944                                     | 259                                         | 1834                                      | 2029                                    | 115                                         | 374                                         |
| 172_904       | 7/4/2018    | 6.75                    | 412                                       | 1446                                    | 634                                         | 1709                                      | 2122                                    | 253                                         | 887                                         |
| 172_904       | 7/5/2018    | 6.75                    | 424                                       | 1458                                    | 597                                         | 1930                                      | 2043                                    | 73                                          | 670                                         |
| 172_904       | 7/6/2018    | 6.75                    | 511                                       | 1016                                    | 305                                         | -                                         | -                                       | 0                                           | 305                                         |
| 172_904       | 7/7/2018    | 6.75                    | 438                                       | 818                                     | 220                                         | -                                         | -                                       | 0                                           | 220                                         |
| 172_692       | 7/13/2018   | 6.92                    | 445                                       | 830                                     | 225                                         | 1936                                      | 2043                                    | 67                                          | 292                                         |
| 172_692       | 7/14/2018   | 6.92                    | 435                                       | 815                                     | 220                                         | -                                         | -                                       | 0                                           | 220                                         |
| 172_632       | 7/20/2018   | 8.04                    | 426                                       | 1102                                    | 396                                         | 1916                                      | 2041                                    | 85                                          | 481                                         |
| 172_753       | 7/27/2018   | 8.16                    | 133                                       | 2045                                    | 1152                                        | -                                         | -                                       | 0                                           | 1152                                        |
| 172_753       | 7/28/2018   | 8.16                    | 2300                                      | 2031                                    | 1291                                        | -                                         | -                                       | 0                                           | 1291                                        |
| 172_453       | 8/4/2018    | 7.1                     | 449                                       | 959                                     | 310                                         | 1915                                      | 2039                                    | 84                                          | 394                                         |
| 172_784       | 8/4/2018    | 7.53                    | 442                                       | 1028                                    | 346                                         | 1951                                      | 2023                                    | 32                                          | 378                                         |
| 172_453       | 8/5/2018    | 7.1                     | 459                                       | 1156                                    | 417                                         | 1613                                      | 2028                                    | 255                                         | 672                                         |

|         |           |      |      |      |     |      |      |     |      |
|---------|-----------|------|------|------|-----|------|------|-----|------|
| 172_784 | 8/5/2018  | 7.53 | 445  | 1100 | 375 | 1852 | 2019 | 87  | 462  |
| 172_453 | 8/6/2018  | 7.1  | 441  | 916  | 275 | 1823 | 2034 | 131 | 406  |
| 172_784 | 8/6/2018  | 7.53 | 449  | 1003 | 314 | -    | -    | 0   | 314  |
| 172_453 | 8/7/2018  | 7.1  | 444  | 1041 | 357 | -    | -    | 0   | 357  |
| 172_784 | 8/7/2018  | 7.53 | 502  | 850  | 228 | -    | -    | 0   | 228  |
| 172_063 | 8/8/2018  | 6.02 | 2335 | 1427 | 892 | 1737 | 2009 | 152 | 1044 |
| 172_453 | 8/8/2018  | 7.1  | 451  | 839  | 228 | -    | -    | 0   | 228  |
| 172_784 | 8/8/2018  | 7.53 | 439  | 852  | 253 | -    | -    | 0   | 253  |
| 172_453 | 8/10/2018 | 7.1  | 456  | 843  | 227 | -    | -    | 0   | 227  |

---

**Fig. S1.** An example of raw skin temperature data that we used to delineate bouts of daily torpor. Periods of time in red blocks represent periods of activity (flying, foraging, etc.), periods of time in blue blocks represent periods of daily torpor, and periods in white represent periods of homeothermy or transition between torpor and homeothermy/activity. To delineate bouts of daily torpor, we used the definition suggested in Barclay et al. (2001).

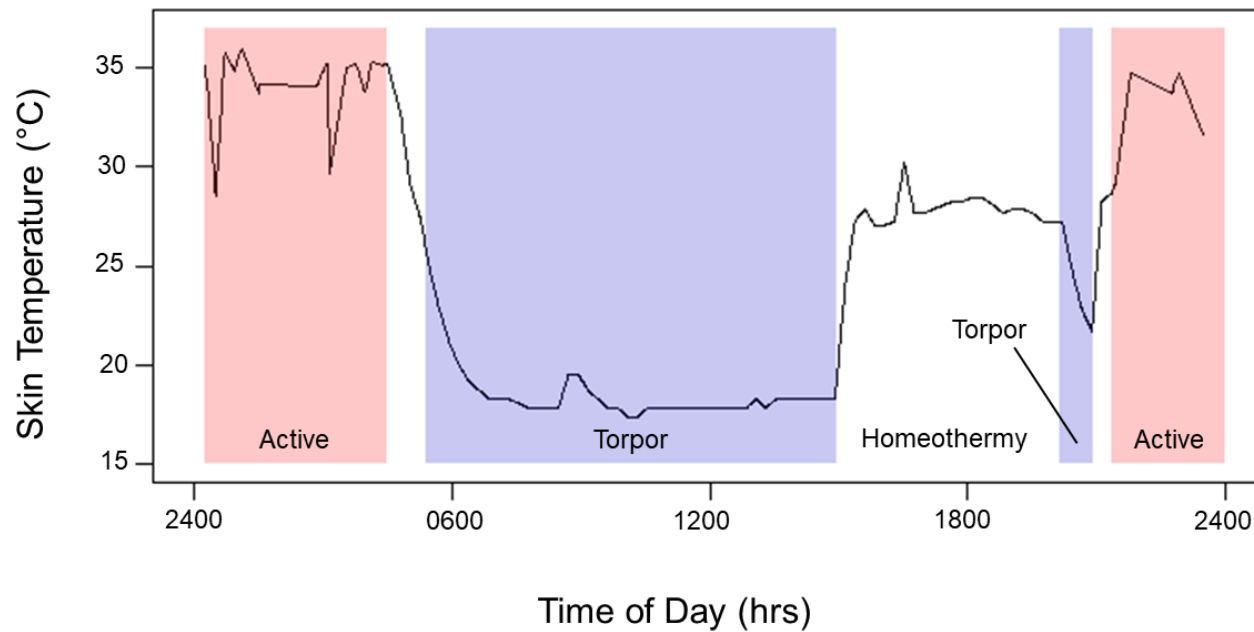

Literature cited

Barclay, R.M., C.L. Lausen, and L. Hollis. 2001. What's hot and what's not: defining torpor in free-ranging birds and mammals. *Canadian Journal of Zoology* 79:1885–1890.

**Fig. S2.** Scatter plot illustrating the conditional effect of daily mean ambient temperature on the total duration of bouts of daily torpor during the day. Each point is based on observed data and represents one day. The line represents the regression line for this relationship and the grey band represents 95% credible intervals around this line. Credible intervals for this conditional effect did not cross zero (parameter estimate: -37.4 min; 95% credible intervals: -64.0 – -12.6 min), indicating that bats spent ca. 37 minutes less in torpor per day for each additional 1°C in daily mean ambient temperature between 0445 hrs and 2100 hrs.

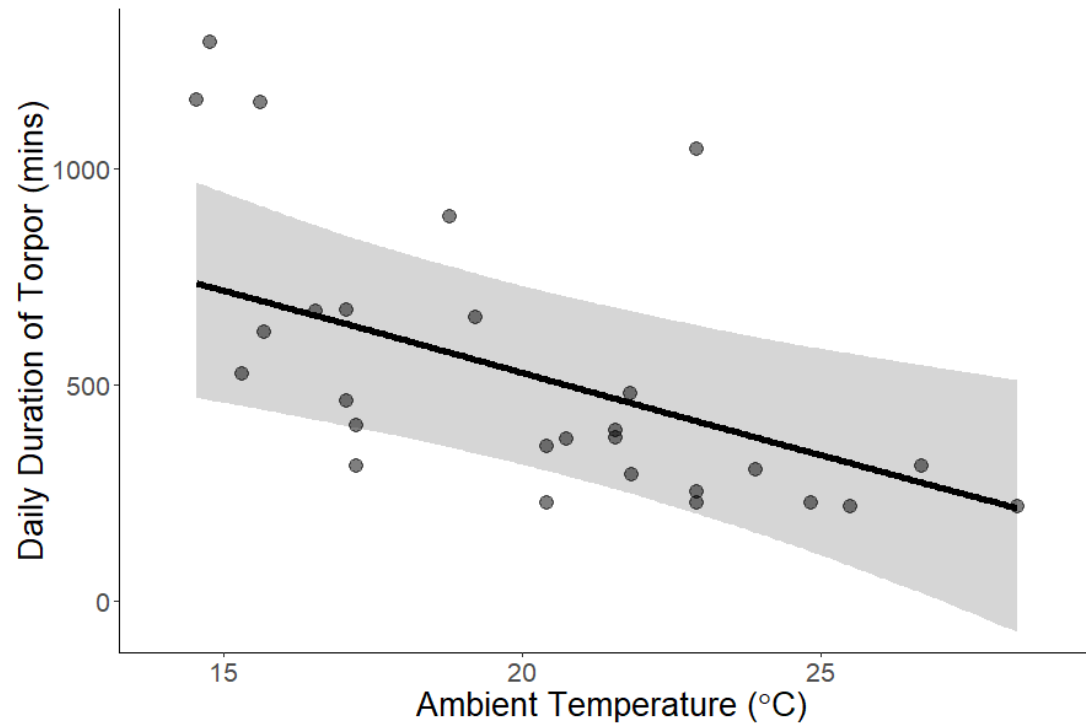

Supplement: ECY-103-0-s001.pdf [file ECY-103-0-s001.pdf]
